# Supplementary material
Source: ML conference proceedings conference paper supplement (https://proceedings.mlr.press/v108/liu20c.html)
Supplement: Supplementary file [file liu20c-supp.pdf]

# Appendix for Competing Bandits in Matching Markets

## A Proof of Theorem 1

Before we turn to the proof of Theorem 1, we present two useful technical lemmas. Throughout the remainder of this section, we say the ranking  $\widehat{r}_{i,t}$  submitted by  $p_i$  at time  $t$  is *valid* if whenever an arm  $a_j$  is ranked higher than  $\overline{m}(i)$ , i.e.  $\widehat{r}_{i,j}(t) < \widehat{r}_{i,\overline{m}(i)}(t)$ , it follows that  $\mu_i(j) > \mu_i(\overline{m}(i))$ .

**Lemma 1.** *If all the agents submit valid rankings to the planner, then the GS-algorithm finds a match  $m$  such that  $\mu_i(m(i)) \geq \mu_i(\overline{m}(i))$  for all players  $p_i$ .*

*Proof.* First we show that true agent optimal matching  $\overline{m}$  is stable according to the rankings submitted by the agents when all those rankings are valid. Let  $a_j$  be an arm such that  $\widehat{r}_{i,j}(t) < \widehat{r}_{i,\overline{m}(i)}(t)$  for an agent  $p_i$ . Since  $\widehat{r}_{i,t}$  is valid, it means  $p_i$  prefers  $a_j$  over  $\overline{m}(i)$  according to the true preferences also. However, since  $\overline{m}$  is stable according to the true preferences, arm  $a_j$  must prefer player  $\overline{m}^{-1}(j)$  over  $p_i$ , where  $\overline{m}^{-1}(j)$  is  $a_j$ 's match according to  $\overline{m}$  or the emptyset if  $a_j$  does not have a match. Therefore, according to the ranking  $\widehat{r}_{i,t}$ ,  $p_i$  has no incentive to deviate to arm  $a_j$  because that arm would reject her. Now, since  $\overline{m}$  is stable according to the rankings  $\widehat{r}_{i,t}$ , we know that the GS-algorithm will output a matching which is at least as good as  $\overline{m}$  for all agents according to the rankings  $\widehat{r}_{i,t}$ . Since all the rankings are valid, it follows that the GS-algorithm will output a matching  $m$  which is at least as good as  $\overline{m}$  according to the true preferences also, i.e.,  $\mu_i(m(i)) > \mu_i(\overline{m}(i))$ .  $\square$

**Lemma 2.** *Consider the agent  $p_i$  and let  $\overline{\Delta}_{i,j} = \mu_i(\overline{m}(i)) - \mu_i(j)$  and  $\overline{\Delta}_{i,\min} = \min_{j: \overline{\Delta}_{i,j} > 0} \overline{\Delta}_{i,j}$ . Then, if  $p_i$  follows the Explore-then-Commit platform (see Table 1(a)), we have*

$$\mathbb{P}(\widehat{r}_{i,hK} \text{ is invalid}) \leq Ke^{-\frac{h\overline{\Delta}_{i,\min}^2}{2}}.$$

*Proof.* Throughout this proof we denote  $t = hK$  as a shorthand. In order for the ranking  $\widehat{r}_{i,t}$  to not be valid there must exist an arm  $a_j$  such that  $\mu_i(\overline{m}(i)) > \mu_i(j)$ , but  $\widehat{r}_{i,j}(t) < \widehat{r}_{i,\overline{m}(i)}(t)$ . This can happen only when  $\widehat{\mu}_{i,j}(t) \geq \widehat{\mu}_{i,\overline{m}(i)}(t)$ . The probability of this event is equal to

$$\begin{aligned} \mathbb{P}(\widehat{\mu}_{i,j}(t) \geq \widehat{\mu}_{i,\overline{m}(i)}(t)) &= \mathbb{P}(\widehat{\mu}_{i,\overline{m}(i)}(t) - \mu_i(\overline{m}(i)) - \widehat{\mu}_{i,j}(t) + \mu_i(j) \leq \mu_i(j) - \mu_i(\overline{m}(i))) \\ &\leq \mathbb{P}(\widehat{\mu}_{i,\overline{m}(i)}(t) - \mu_i(\overline{m}(i)) - \widehat{\mu}_{i,j}(t) + \mu_i(j) \leq \overline{\Delta}_{i,\min}). \end{aligned}$$

Since each agent pulls each arm exactly  $h$  times during the exploration stage and since the rewards from each arm are 1-sub-Gaussian, we know that  $\widehat{\mu}_{i,j'}(t) - \mu_i(j') - \widehat{\mu}_{i,j}(t) + \mu_i(j)$  is  $\sqrt{2/h}$ -sub-Gaussian. Therefore,

$$\mathbb{P}(\widehat{\mu}_{i,j}(t) \geq \widehat{\mu}_{i,\overline{m}(i)}(t)) \leq e^{-\frac{h\overline{\Delta}_{i,\min}^2}{4}}.$$

The conclusion follows by a union bound over all possible arms  $a_j$ .  $\square$

*Proof of Theorem 1.* During the exploration stage each player  $p_i$  pulls each arm  $a_j$  exactly  $h$  times. Therefore, the expected agent-optimal stable regret of agent  $p_i$  after the first  $hK$  time steps is exactly equal to  $h \sum_{j=1}^K \bar{\Delta}_{i,j}$  (note that  $\bar{\Delta}_{i,j}$  might be negative for some values of  $j$ ). The agent-optimal stable regret  $p_i$  from time  $hK + 1$  to time  $n$  is at most  $(n - hK)\bar{\Delta}_{i,\max}$ . However, from Lemma 1 we know that  $p_i$  can incur positive regret only if there exists a player who submits an invalid ranking at time  $hK + 1$ . Lemma 2, together with a union bound over all agents, ensures that the probability there exists a player who submits an invalid ranking is at most  $N \exp\left(-\frac{h\Delta^2}{4}\right)$ . This completes the proof.  $\square$
